# Supplementary material for: Development and validation of an Arabic questionnaire to assess dentist knowledge on managing deep caries cavities
Source: Research Square preprint supplement (doi:10.21203/rs.3.rs-3949388/v1), 2024-03-13
Supplement: Supplementary file 1 [file fbef5d5cc294d0d222b06b2a.docx]

| **Demographic variables** | | |
| --- | --- | --- |
| **1** | **sex** | Male |
| female |
| **2** | **age** | _____________ |
| **3** | **Clinical experience** | Less than 5 years |
| 5-10 years |
| More than 10 years |
| **4** | **specialty** | General dentist |
| endodontics |
| other |
| **5** | **How many cases you treat per day** | Less than 5 cases |
| More than 5 cases |
| **Diagnosis** | | |
| **How do you ensure the satisfying removal of carious dentine in deep carious lesions** | | |
| **6a** | **According to dentine hardness** | When I reach to leathery dentine that needs to apply pressure to remove |
|  |
|  |
| When I reach hard dentine |
| **6b** | **According to dentine color** | Colored dentine |
| Normal color |
| **6c** | **In deep carious lesions, Do you do a radiograph before the treatment?** | Yes |
| No |
| **6d** | **In deep carious lesions, do you apply rubberdam?** | Yes |
| No |
| **6e** | **What kind of x-ray you take pre operative?** | Bitewing x-ray |
| Other ( panorama- periapical) |
| **6f** | **Do you examine teeth vitality before operating?** | yes |
| no |
| **6h** | **If yes, what kind of test you do usually?** | Cold tests |
| Heat test |
| Electronic device |
|  |  |

| **Type of treatment according to different cases** | | | |
| --- | --- | --- | --- |
| **in cases of reversible pulpitis and immature teeth (open apex)** | | | |
| Complete caries removal | **What type of technique you follow?** | | 1. **7** |
| One visit selective removal |
| Two visits selective removal |
| Direct pulp capping | **In cases of pulp exposure, what type of treatment you go for?** | | 1. **7** |
| partial pulpotomy |
| coronal pulpotomy |
| Root canal treatment |
| **in cases of reversible pulpitis and mature teeth (closed apex)** | | | |
| Complete caries removal | **What type of technique you follow?** | | 8a |
| One visit selective removal |
| Two visits selective removal |
| Direct pulp capping | **In cases of pulp exposure, what type of treatment you go for?** | | 8b |
| partial pulpotomy |
| coronal pulpotomy |
| Root canal treatment |
| **in cases of irreversible pulpitis and immature teeth (open apex)** | | | |
| Direct pulp capping | What is the endodontic treatment approach you go with ? | 9 | |
| partial pulpotomy |
| coronal pulpotomy |
| Root canal treatment |
| **in cases of irreversible pulpitis and mature teeth (closed apex)** | | | |
| Direct pulp capping | What is the endodontic treatment approach you go with ? | 10 | |
| partial pulpotomy |
| coronal pulpotomy |
| Root canal treatment |
|  | | | |
| **What tools you usually use when dealing with deep carious lesions** | | | |
| 1. Carbide burs 2. Spoon excavators 3. Diamond burs 4. Cariosolve | I use usually :  (you can select one or more) | 11a | |
| 1. Calcium hydroxide 2. MTA 3. Bioceramic putty 4. Biodentine | Which of these materials you usually apply on vital pulp? | 11b | |

| 12 - which of these factors you consider before deciding the treatment plan? | | |
| --- | --- | --- |
| 1. 12 | Oral hygiene of the patient | Yes |
| No |
| 1. 12 | Patient age | Yes |
| No |
| 1. 12 | Patient compliance | Yes |
| No |
| 1. 12 | Follow up | Yes |
| No |
